# Supplementary material
Source: Research Square preprint supplement (doi:10.21203/rs.3.rs-9397248/v1)
Supplement: Supplementary file 1 [file 37028288782e0ad168cddb3c.docx]

**Title: Ecological Momentary Assessment (EMA) Questionnaire for the Study: “Physiological Correlates of Anxiety-Driven Binge Eating in a Naturalistic Setting”**

**Principal Investigator:** Dr. Crystal (Yixuan) Liang
**Affiliation:** Klinik für Psychiatrie, Psychotherapie und Psychosomatik, Freie Universität Berlin
**Ethics Approval:** Freie Universität Berlin Ethics Committee, Approval No. 6734
**Study Period:** 15 December 2024 – 12 September 2025
**License:** Creative Commons Attribution 4.0 International (CC BY 4.0)

## ****1. Introduction and Background****

This ecological momentary assessment (EMA) instrument was developed by **Liang et al. (2025)** as part of a 14-day ambulatory monitoring protocol examining the physiological and contextual correlates of anxiety-driven binge eating in adults diagnosed with **Binge-Eating Disorder (BED)**, **Generalized Anxiety Disorder (GAD)**, both, or neither (healthy controls).

The questionnaire was implemented via a secure mobile EMA platform (MetricWire v3.2 / mEMA) and synchronized with continuous electrocardiographic (ECG) recordings of heart-rate variability (HRV) and salivary cortisol sampling. The instrument captures **moment-to-moment affective states**, **urge to binge**, and **contextual variables** in participants’ natural environments.

This document presents the full wording, response formats, and administration schedule of all EMA items used in the study. It is provided to ensure full reproducibility and transparency under an open-access license, in compliance with PLOS ONE submission requirements for new tools.

## ****2. Overview of Administration****

- **Frequency:** Five semi-random prompts per day, between **08:00 and 22:00**, spaced to avoid clustering within any two-hour window.
- **Prompt types:**
  - **Signal-contingent surveys:** randomly triggered within waking hours.
  - **Event-contingent surveys:** participant-initiated immediately following any binge-eating episode.
- **Estimated completion time:** 1.5 – 2 minutes per survey.
- **Delivery device:** study-issued smartphone (Android 12) with secure app and offline encryption.
- **Response format:** visual analogue scale (VAS 0–100), categorical multiple-choice, and short free-text options where specified.
- **Compliance monitoring:** response timestamps logged automatically; non-responses recorded as missing without penalty.

## ****3. General Instructions Shown to Participants****

“Please rate how you feel right now. Use the sliders to indicate your current state. There are no right or wrong answers—please respond as honestly and quickly as possible. Your responses are confidential and will not affect your participation or compensation.”

## ****4. Signal-Contingent (Random) EMA Items****

| **Domain** | **Item Text (Displayed Wording)** | **Response Format** | **Scale Anchors** | **Origin / Note** |
| --- | --- | --- | --- | --- |
| **Momentary Anxiety** | “How anxious or tense do you feel right now?” | 0–100 VAS | 0 = Not at all; 100 = Extremely anxious | Newly developed; phrasing adapted from Cook & Krishnan (2024, CC BY 4.0) |
| **Urge to Binge** | “How strong is your urge to eat large amounts of food right now?” | 0–100 VAS | 0 = No urge; 100 = Strongest urge ever | Adapted from prior EMA binge-eating literature (Dingemans et al. 2017) |
| **Stress** | “How stressed or overwhelmed do you feel right now?” | 0–100 VAS | 0 = Not stressed; 100 = Extremely stressed | Newly developed |
| **Sadness / Low Mood** | “How sad, down, or discouraged do you feel right now?” | 0–100 VAS | 0 = Not at all; 100 = Extremely sad | Adapted from affective EMA norms |
| **Energy / Fatigue** | “How energetic or tired do you feel right now?” | 0–100 VAS | 0 = Very tired; 100 = Very energetic | Newly developed control item |
| **Perceived Control** | “Right now, how much control do you feel over your behavior and thoughts?” | 0–100 VAS | 0 = No control; 100 = Complete control | Newly developed |
| **Context – Location** | “Where are you right now?” | Multiple choice | Home / Work or school / Public place / Someone else’s home / Other | Newly developed |
| **Context – Social Setting** | “Who are you with right now?” | Multiple choice | Alone / Friends / Family / Coworkers / Strangers / Other | Newly developed |
| **Context – Activity** | “What are you mainly doing right now?” | Multiple choice | Eating / Working or studying / Resting / Commuting / Using phone or computer / Other | Newly developed |
| **Perceived Stress Cause** | “If you feel stressed, what do you think is causing it?” | Short text response (optional) | — | Exploratory qualitative item |

## ****5. Event-Contingent (Binge Episode) Survey****

Triggered manually by participants immediately after perceiving that a binge-eating episode had occurred.

| **Domain** | **Item Text** | **Response Format** | **Scale Anchors** | **Purpose / Note** |
| --- | --- | --- | --- | --- |
| **Event Verification** | “Since your last report, did you experience a binge episode (eating an unusually large amount of food with a feeling of loss of control)?” | Yes / No | — | Defines event onset |
| **Pre-Binge Anxiety** | “How anxious did you feel right before the binge episode?” | 0–100 VAS | 0 = Not anxious; 100 = Extremely anxious | Predictive variable |
| **Perceived Loss of Control** | “During the episode, how much control did you feel you had over your eating?” | 0–100 VAS | 0 = No control; 100 = Complete control | Subjective control index |
| **Shame / Guilt** | “Immediately after the episode, how ashamed or guilty did you feel?” | 0–100 VAS | 0 = Not at all; 100 = Extremely | Post-binge affect |
| **Location of Episode** | “Where did the binge episode occur?” | Multiple choice | Home / Work / Public place / Restaurant / Other | Contextual |
| **Companionship During Episode** | “Were you alone or with others during the episode?” | Multiple choice | Alone / With others | Contextual |
| **Duration Estimate** | “Approximately how long did the binge episode last?” | Multiple choice | <15 min / 15–30 min / 30–60 min / >60 min | Behavioral descriptor |
| **Aftermath Behavior** | “After the binge, what did you do?” | Multiple choice | Continued normal activities / Rested / Used phone or screen / Ate more / Other | Behavioral follow-up |
| **Physical Discomfort** | “How physically uncomfortable did you feel after the binge?” | 0–100 VAS | 0 = None; 100 = Extreme | Physiological marker |
| **Post-Event Notes** | “Please describe any factors that you think contributed to this binge episode.” | Optional free-text | — | Qualitative context |

Event entries were timestamped automatically and linked to corresponding 60-minute physiological windows preceding and following the binge for analytic alignment.

## ****6. End-of-Day (Optional) Diary****

Participants completed this once per evening between 21:00 and 23:00.

1. “How was your overall mood today?” (0–100 VAS; 0 = Very negative; 100 = Very positive)
2. “How much anxiety did you experience overall today?” (0–100 VAS)
3. “How often did you feel strong urges to binge today?” (0 = Never – 5 = Constantly)
4. “Did you engage in any binge episodes today?” (Yes / No → if Yes, number of episodes = [ __ ])
5. “How well did you sleep last night?” (0–100 VAS; 0 = Very poorly; 100 = Very well)
6. “How physically active were you today?” (0–100 VAS)
7. “Did you take any medication today?” (Yes / No; If yes, specify in comment box)

## ****7. Timing and Compliance Features****

- **Prompt generation:** Semi-random intervals with minimum 90-minute spacing to prevent habituation.
- **Response window:** 10 minutes; uncompleted prompts recorded as missed.
- **Compliance feedback:** Participants received daily completion summaries and automated reminders if two prompts were missed consecutively.
- **Incentives:** €2 per completed EMA prompt, included in total compensation (up to €300).

## ****8. Integration with Physiological and Contextual Data****

Each EMA response was time-linked via UNIX timestamp to:

- **Heart-rate variability (HRV)** data from the Firstbeat Bodyguard 2 device (RMSSD metric, ms).
- **Physical activity** data from accelerometry (step count, movement variance).
- **GPS-derived mobility** (location variance per hour).
- **Screen-time metrics** (minutes active per 60-min window).
- **Salivary cortisol** samples (when applicable).

These integrations enabled moment-to-moment modeling of psychological–physiological covariation.

## ****9. Validation and Internal Consistency****

Although designed for momentary assessment rather than traditional psychometrics, the EMA instrument demonstrated acceptable reliability:

- **Between-subject ICC (average measures):** 0.71 for Anxiety, 0.68 for Urge to Binge, 0.65 for Stress.
- **Within-person reliability:** McDonald’s ω = 0.80 for composite affect index.
  Convergent validity was evidenced by significant correlations between average EMA anxiety and baseline STAI-T (r = 0.56, p < .001).

## ****10. Adaptations from Existing Sources****

Several item concepts were derived from prior open-licensed or commonly used EMA studies:

- Cook D.J. & Krishnan S. (2024). Understanding the relationship between EMA methods, sensed behavior, and responsiveness — ResearchGate Preprint (CC BY 4.0).
- Dingemans A., Danner U., & Parks M. (2017). Emotion regulation in binge-eating disorder — Neuroscience & Biobehavioral Reviews 79, 1–11.
  All adapted items were reworded to maintain original meaning while ensuring plain-language clarity for German-speaking participants. The resulting instrument constitutes a **novel composite scale** specific to the study’s aims.

## ****11. Data Availability and Licensing****

The complete questionnaire text and administration details are released under:
**Creative Commons Attribution 4.0 International License (CC BY 4.0).**

You are free to share and adapt this material for any purpose, provided that appropriate credit is given as follows:

Citation: Liang C Y, Taylor A, Qiu C, Salbach H (2025). Ecological Momentary Assessment Questionnaire for “Physiological Correlates of Anxiety-Driven Binge Eating in a Naturalistic Setting.” Freie Universität Berlin. CC BY 4.0.

If redistributed or modified, please include the above citation and note any changes.

## ****12. Sample Display Layout (Screenshot Description)****

Participants viewed one item per screen with a horizontal slider. Example:

**Item:** “How anxious or tense do you feel right now?”
**Scale:** [ 0 — Not at all | 100 — Extremely anxious ]
**Slider position:** Numeric value displayed when submitted.

Buttons: **Submit / Skip / Cancel**.
Skip was allowed only for optional qualitative questions.

## ****13. Ethical Considerations****

- The EMA app transmitted encrypted data via SSL to secure university servers.
- No GPS coordinates, communication logs, or personally identifying metadata were stored.
- All questionnaire responses were pseudonymized at the point of entry.
- Participants could review or delete entries before submission.

These safeguards complied with the **EU GDPR** and the **Ethics Committee Approval No. 6734**.

## ****14. Translation****

The instrument was originally delivered in **German**, developed through forward–backward translation by bilingual experts. The English version presented here represents a **conceptual translation** for open dissemination. Both versions are available upon request or via the study’s OSF repository.

## ****15. Contact for Reuse and Citation****

For questions or reuse permissions beyond the CC BY license (e.g., translation, adaptation, or integration into other studies):

**Contact:**
Dr. Crystal (Yixuan) Liang
Department of Neuroscience, Johns Hopkins University
Email: yliang56@jh.edu

## ****16. License Statement****

© 2025 Crystal (Yixuan) Liang, Angela Taylor, Chuyu Qiu, and Harriet Salbach.
This document is distributed under the **Creative Commons Attribution 4.0 International License (CC BY 4.0)**.

You may copy, distribute, remix, and build upon this material for any purpose, even commercially, provided appropriate credit is given to the original authors and source.
