# Supplementary material
Source: Research Square preprint supplement (doi:10.21203/rs.3.rs-9397248/v1)
Supplement: Supplementary file 2 [file a678cc1399ef64967a3a7e2b.docx]

# S2 Text. Supplementary Methods: Preprocessing, Quality Control, and Analytic Pipelines

## Overview

This supplement details data preprocessing, quality control (QC), and statistical pipelines for the ambulatory and laboratory components, including ECG-derived HRV (RMSSD), salivary cortisol, Ecological Momentary Assessment (EMA), and passive smartphone sensing. Procedures are aligned with the main manuscript and PLOS ONE transparency standards.

## ECG and HRV Preprocessing

Interbeat interval (IBI) data were recorded at ≥1000 Hz using a validated ambulatory ECG device (e.g., Firstbeat Bodyguard 2). Raw IBIs were processed in Kubios HRV Premium with automatic artifact correction (threshold: very strong) and manual inspection. Epochs with <80% valid beats or >5% ectopic beats were excluded. HRV was summarized as RMSSD (ms). For binge analyses, 60-min pre-episode windows were extracted along with time-matched control windows without binge episodes. Wear-time (minutes) within each 60-min window was computed and included as a covariate in sensitivity analyses.

## Cortisol Sampling and Assay

Participants provided salivary samples at waking, +30 minutes post-waking, 16:00, and 21:00 during ambulatory monitoring, and at baseline, immediately post-TSST, and +10, +20, +30, +45, and +60 minutes post-TSST in the laboratory. Samples were stored at −80 °C and assayed in duplicate using high-sensitivity enzyme immunoassay kits (Salimetrics). Batch effects were minimized by distributing samples evenly across plates. Inter- and intra-assay CVs should be reported here. Cortisol Awakening Response (CAR) and diurnal slope were derived using standard procedures. TSST reactivity was summarized as AUCi.

## EMA and Passive Sensing Processing

EMA prompts (5/day between 08:00–22:00) queried anxiety, urge to binge, sadness, and stress on 0–100 VAS scales. Event-contingent entries were completed immediately after binge episodes. Passive sensing captured GPS-derived location variance, accelerometry, screen time, and communication frequency. All smartphone data were anonymized and restricted to study-specific features. EMA timestamps were synchronized to physiology using device clocks; where necessary, ±5-minute tolerance windows were applied for alignment.

## Missing Data and Compliance

We quantified EMA compliance as the proportion of prompts completed (target ≥70%). ECG wear compliance reflected the proportion of waking hours with valid IBI data. For multilevel models, we used maximum likelihood estimation, which accommodates data missing at random (MAR) at Level 1. Sensitivity analyses excluded days with <50% EMA completion or <8 hours of ECG wear.

## Statistical Models

All analyses were conducted in R (version 4.3). Preliminary group comparisons used ANOVA/χ² with Bonferroni-corrected post hoc tests. Laboratory TSST reactivity (cortisol AUCi; HRV recovery) was evaluated via ANCOVA controlling for age, sex, and BMI.

### Multilevel Models (EMA Outcomes)

Momentary urge to binge was modeled with multilevel models (observations nested within participants). Level 1 predictors (lagged anxiety, HRV, cortisol) were person-mean centered and controlled for time of day and physical activity. Level 2 moderators included diagnostic group and TSST reactivity indices. Random intercepts were included for all models; random slopes for anxiety were added when they improved fit (AIC/BIC). Model assumptions and residual diagnostics were examined; HRV and cortisol were log-transformed as needed.

### Multilevel Logistic Regression (Binge Episodes)

Binge occurrence (0/1) in 60-min pre-episode windows was modeled using multilevel logistic regression with predictors: pre-binge anxiety, HRV, cortisol, and contextual features (location variance, screen time). Odds ratios and 95% CIs were reported. Sensitivity models adjusted for psychotropic medication and baseline depression (BDI-II).

### Random Forest Classifier

A Random Forest classifier (1000 trees, 10-fold cross-validation) was trained to classify binge vs. non-binge epochs. Performance metrics included AUC, accuracy, precision, recall, specificity, and F1-score. Feature importance was quantified via mean decrease in Gini impurity. Balanced subsampling was used to equalize class distributions. Hyperparameters can be tuned as needed and reported here.

## Reproducibility and Software

Analyses were implemented in R 4.3. Example packages include lme4/glmmTMB for multilevel models and ranger/randomForest for classifiers. ECG processing used Kubios HRV Premium. All scripts and parameter files can be provided upon request or deposited in an OSF repository per journal policy.
